# Supplementary material
Source: PubMed Central journal article supplement (PMC7691212)
Supplement: mmc4.pdf [file mmc4.pdf]

## Data S1

Complete RNA sequences are as follows.

**T7 Plasmid sequences**

**Frameshifting-region**

**GGG**AGAGCGGCCGCCAGATCTTCCGGATGGCTCGAGTTTTTCAGCAAGATTGGCTGTAGT  
TGTGATCAACTCCGCGAACCCATGCTTCAGTCAGCTGATGCACAATCGTTTTTAAAC**GGGT**  
**TTGCGGTGTAAGTGCAGCCCGTCTTACACCGTGCGGCACAGGCACTAGTACTGATGTCGT**  
**ATACAGGGCTTTTGACAT**CTACAATGATAAAGTAGCTGGTTTTGCTAAATTCCTAAAACTA  
ATTGTTGTCGCTTCCAAGAAAAGGACGAAGATGACAATTTAATTGATTCTTACTTTGTAGTTA  
AGAGACACACTTTCTCTAACTACCAACATGAAGAAACAATTTATAATTTACTTAAGGATTGTC  
CAGCTGTTGCTAAACATGACTTCTTTAAGTTTAGAATAGACGGTGACATGGTACCACATATA  
TCACGTCAACGTCTTACTAAATACACAATGGCAGACCTCGTCTATGCTTTAAGGCATTTTGA  
TGAAGGTAATTGTGACACATTAAGAAATACTTGTACATACAATTGTTGTGATGATGATTA  
TTTCAATAAAAAGGACTGGTATGATTTTGTAGAAAACCCAGATATATTACGCGTATACGCCA  
ACTTAGGTGAACGTGTACGCCAAGCTTTGTTAAAAACAGTACAATTCTGTGATGCCATGCG  
AAATGCTGGTATTGTTGGTGTACTGACATTAGATAATCAAGATCTCAATGGTAACTGGTATG  
ATTTCCGGTGATTTCATACAAACCACGCCAGGTAGTGGAGTTCCTGTTGTAGATTCTTATTAT  
TCATTGTTAATGCCTATATTAACCTTGACCAGGGCTTTAACTGCAGAGTCACATGTTGACAC  
TGACTTAACAAAGCCTTACATTAAGTGGGATTTGTTAAAATATGACTTCACGGAAGAGAGGT  
TAAACTCTTTGACCGTTATTTTAAATATTGGGATCAGACATACCACCCAAATTGTGTTAACT  
GTTTGGATGACAGATGCATTCTGCATTGTGCAAACCTTAAATGTTTTATTCTCTACAGTGT**ATC**  
**TTT**

5'-End

**T7 Plasmid sequences**

**5'-UTR ORF1ab**

**5'-UTR recombined onto Nucleocapsid**

**GGG**AGAGCGGCCGCCAGATCTTCCGGATGGCTCGAGTTTTTCAGCAAGATTAAAGGTTT  
ATACCTTCCCAGGTAACAAACCAACCAACTTTCGATCTCTTGTAGATCTGTTCTCTAAACGA  
**AC**TTTAAATCTGTGTGGCTGTCACCTCGGCTGCATGCTTAGTGCACCTCACGCAGTATAATTA

ATAACTAATTACTGTCGTTGACAGGACACGAGTAACTCGTCTATCTTCTGCAGGCTGCTTAC  
GGTTTCGTCCGTGTTGCAGCCGATCATCAGCACATCTAGGTTTCGTCCGGGTGTGACCGA  
AAGGTAAGATGGAGAGCCTTGTCCCTGGTTTCAACGAGAAAACACACGTCCAACCTCAGTTT  
GCCTGTTTTACAGGTTGCGGACGTGCTCGTACGTGGCTTTGGAGACTCCGTGGAGGAGGT  
CTTATCAGAGGCACGTCAACATCTTAAAGATGGCACTTGTGGCTTAGTAGAAGTTGAAAA  
GGCGTTTTGCCTCAACTTGAACAGCCCTATGTGTTTCATCAAACGTTCCGGATGCTCGAACTG  
CACCTCATGGTCATGTTATGGTTGAGCTGGTAGCAGAACTCGAAGGCATTAGTACGGTCCG  
TAGTGGTGAGACACTTGGTGTCTTGTCCCTCATGTGGGCGAAATACCAGTGGCTTACCG  
CAAGGTTCTTCTTCGTAAGAACGGTAATAAAGGAGCTGGTGGCCATAGTTACGGCGCCGAT  
CTAAAGTCATTTGACTTAGGCGACGAGCTTGGCACTGATCCTTATGAAGATTTTCAAGAAAA  
CTGGAACACTAAACATAGCAGTGGTGTACCCGTGAACTCATGCGTGAGCTTAACGGAGG  
GGCATACTCGCTATGTCGATAACAACCTTCTGTGGCCCTGATGGCTACCCTCTTGAGTGC  
ATTAAGACCTTCTAGCACGTGCTGGTAAAGCTTCATGCACTTTGTCCGAACAACCTGGACTT  
TATTGACACTAAGAGGGGTGTATACTGCTGCCGTGAACATGAGCATGAAATTGCTTGGTAC  
ACGGAACGTTCTATCTTT

PS-region (homologous to SARS-CoV-1 Packaging signal)

GGGAGAGCGGCCGCCAGATCTTCCGGATGGCTCGAGTTTTTTCAGCAAGATTTTGAGCTTT  
GGGCTAAGCGCAACATTAACCAGTACCAGAGGTGAAAATACTCAATAATTTGGGTGTGGA  
CATTGCTGCTAATACTGTGATCTGGGACTACAAAAGAGATGCTCCAGCACATATATCTACTA  
TTGGTGTGTTTCTATGACTGACATAGCCAAGAAACCAACTGAAACGATTTGTGCACCACTC  
ACTGTCTTTTTTGATGGTAGAGTTGATGGTCAAGTAGACTTATTTAGAAATGCCCGTAATGG  
TGTCTTATTACAGAAGGTAGTGTTAAAGGTTTACAACCATCTGTAGGTCCCAAACAAGCTA  
GTCTTAATGGAGTCACATTAATTGGAGAAGCCGTAAAAACACAGTTCAATTATTATAAGAAA  
GTTGATGGTGTGTTGCCAACAATTACCTGAACTTACTTTACTCAGAGTAGAAATTTACAAGA  
ATTTAAACCAGGAGTCAAATGGAAATTGATTTCTTAGAATTAGCTATGGATGAATTCATTG  
AACGGTATAAATTAGAAGGCTATGCCTTCGAACATATCGTTTATGGAGATTTTAGTCATAGT  
CAGTTAGGTGGTTTAAATCTTT

Nucleocapsid Sub-genomic RNA

GATTAAAGGTTTATACCTTCCCAGGTAACAAACCAACCAACTTTCGATCTCTTGTAGATCTG  
TTCTCTAAACGAACAACTAAAATGTCTGATAATGGACCCCAAAATCAGCGAAATGCACCCC

GCATTACGTTTGGTGGACCCTCAGATTCAACTGGCAGTAACCAGAATGGAGAACGCAGTG  
GGGCGCGATCAAAACAACGTCGGCCCCAAGGTTTACCCAATAATACTGCGTCTTGGTTCAC  
CGCTCTCACTCAACATGGCAAGGAAGACCTTAAATTCCTCGAGGACAAGGCGTTCCAATT  
AACACCAATAGCAGTCCAGATGACCAAATTGGCTACTACCGAAGAGCTACCAGACGAATTC  
GTGGTGGTGACGGTAAAATGAAAGATCTCAGTCCAAGATGGTATTTCTACTACCTAGGAAC  
TGGGCCAGAAGCTGGACTTCCCTATGGTGCTAACAAAGACGGCATCATATGGGTTGCAAC  
TGAGGGAGCCTTGAATACACCAAAAGATCACATTGGCACCCGCAATCCTGCTAACAAATGCT  
GCAATCGTGCTACAACCTCCTCAAGGAACAACATTGCCAAAAGGCTTCTACGCAGAAGGGA  
GCAGAGGCGGCAGTCAAGCCTCTTCTCGTTCCTCATCACGTAGTCGCAACAGTTCAAGAAA  
TTCAACTCCAGGCAGCAGTAGGGGAACCTTCTCCTGCTAGAATGGCTGGCAATGGCGGTGA  
TGCTGCTCTTGCTTTGCTGCTGCTTGACAGATTGAACCAGCTTGAGAGCAAAATGTCTGGT  
AAAGGCCAACAAACAAGGCCAAACTGTCACTAAGAAATCTGCTGCTGAGGCTTCTAAGA  
AGCCTCGGCAAAAACGTAAGTCCACTAAAGCATAACAATGTAACACAAGCTTTCGGCAGACG  
TGGTCCAGAACAACCCAAGGAAATTTGGGGACCAGGAACTAATCAGACAAGGAACTGAT  
TACAAACATTGGCCGCAAATTGCACAATTTGCCCCAGCGCTTCAGCGTTCTTCGGAATGT  
CGCGCATTGGCATGGAAGTCACACCTTCGGGAACGTGGTTGACCTACACAGGTGCCATCA  
AATTGGATGACAAAGATCCAATTTCAAAGATCAAGTCATTTTGCTGAATAAGCATATTGAC  
GCATACAAAACATTCCCACCAACAGAGCCTAAAAAGGACAAAAAGAAGAAGGCTGATGAAA  
CTCAAGCCTTACCGCAGAGACAGAAGAAACAGCAAACCTGTGACTCTTCTTCCTGCTGCAGA  
TTTGGATGATTTCTCCAACAATTGCAACAATCCATGAGCAGTGCTGACTCAACTCAGG

#### 387 Additional Nucleotides

CTAGAAGATCTCCTACAATATTCTCAGCTGCCATGGAAAATCGATGTTCTTCTTTTATTCTCT  
CAAGATTTTCAGGCTGTATATTA AAACTTATATTAAGAACTATGCTAACCACCTCATCAGGAA  
CCGTTGTAGGTGGCGTGGGTTTTCTTGGCAATCGACTCTCATGAAAACCTACGAGCTAAATA  
TTCAATATGTTCTTCTTGACCAACTTTATTCTGCATTTTTTTTTGAACGAGGTTTAGAGCAAGC  
TTCAGGAAACTGAGACAGGAATTTTATTA AAAATTTAAATTTTGAAGAAAGTTTCAGGGTTAAT  
AGCATCCATTTTTTTGCTTTGCAAGTTCTCAGCATTCTTAACAAAAGACGTCTTTTTGACAT  
GTTTAAAGTTT

#### 1988 Additional Nucleotides

CTAGAAGATCTCCTACAATATTCTCAGCTGCCATGGAAAATCGATGTTCTTCTTTTATTCTCT  
CAAGATTTTCAGGCTGTATATTA AAACTTATATTAAGAACTATGCTAACCACCTCATCAGGAA  
CCGTTGTAGGTGGCGTGGGTTTTCTTGGCAATCGACTCTCATGAAAACCTACGAGCTAAATA

TTCAATATGTTCTCTTGACCAACTTTATTCTGCATTTTTTTTTGAACGAGGTTTAGAGCAAGC  
TTCAGGAAACTGAGACAGGAATTTTATTAATAAATTTAAATTTTGAAGAAAGTTCAGGGTTAAT  
AGCATCCATTTTTTTGCTTTGCAAGTTCCTCAGCATTCTTAACAAAAGACGTCTCTTTTGACAT  
GTTTAAAGTTTAAACCTCCTGTGTGAAATTGTTATCCGCTCACAATTCCACACATTATACGA  
GCCGGAAGCATAAAGTGTAAGCCTGGGGTGCCTAATGAGTGAGCTAACTCACATTAATTG  
CGTTGCGCTCACTGCCAATTGCTTTCCAGTCGGGAAACCTGTCGTGCCAGCTGCATTAATG  
AATCGGCCAACGCGCGGGGAGAGGCGGTTTGCATATTGGGCGCTCTTCCGCTTCCCTCGC  
TCACTGACTCGCTGCGCTCGGTCGTTCCGGCTGCGGCGAGCGGTATCAGCTCACTCAAAGG  
CGGTAATACGGTTATCCACAGAATCAGGGGATAACGCAGGAAAGAACATGTGAGCAAAG  
GCCAGCAAAGGCCAGGAACCGTAAAAAGGCCGCGTTGCTGGCGTTTTTTCATAGGCTCC  
GCCCCCTGACGAGCATCAAAAAATCGACGCTCAAGTCAGAGGTGGCGAAACCCGACAG  
GACTATAAAGATACCAGGCGTTTCCCCCTGGAAGCTCCCTCGTGCGCTCTCCTGTTCCGAC  
CCTGCCGCTTACCGGATACCTGTCCGCCTTTCTCCCTTCGGGAAGCGTGGCGCTTTCTCAT  
AGCTCACGCTGTAGGTATCTCAGTTCGGTGTAGGTCGTTCCGCTCCAAGCTGGGCTGTGTG  
CACGAACCCCCCGTTTCAGCCCGACCGCTGCGCCTTATCCGGTAACTATCGTCTTGAGTCC  
AACCCGGTAAGACACGACTTATCGCCACTGGCAGCAGCCACTGGTAACAGGATTAGCAGA  
GCGAGGTATGTAGGCGGTGCTACAGAGTTCTTGAAGTGGTGGCCTAACTACGGCTACACT  
AGAAGGACAGTATTTGGTATCTGCGCTCTGCTGAAGCCAGTTACCTTCGGAAAAAGAGTTG  
GTAGCTCTTGATCCGGCAAACAAACCACCGCTGGTAGCGGTGGTTTTTTTTGTTTGCAAGCA  
GCAGATTACGCGCAGAAAAAAGGATCTCAAGAAGATCCTTTGATCTTTTCTACGGGGTCT  
GACGCTCAGTGGAACGAAAACCTCACGTTAAGGGATTTTGGTCATGAGATTATCAAAAAGGA  
TCTTACCTAGATCCTTTTAAATTAATAAATGAAGTTTTAAATCAATCTAAAGTATATATGAGTA  
AACTTGGTCTGACAGTTACCAATGCTTAATCAGTGAGGCACCTATCTCAGCGATCTGTCTAT  
TTCGTTTCATCCATAGTTGCCTGACTCCCCGTCGTGTAGATAACTACGATACGGGAGGGCTT  
ACCATCTGGCCCCAGTGCTGCAATGATACCGCGAGACCCACGCTCACCGGCTCCAGATTT  
ATCAGCAATAAACCAGCCAGCCGGAAGGGCCGAGCGCAGAAGTGGTCCTGCAACTTTATC  
CGCCTCCATCCAGTCTATTAATTGTTGCCGGGAAGCTAGAGTAAGTAGTTCCGCCAGTTAAT  
AGTTTGCGCAACGTTGTTGCCATTGCTACAGGCATCGTGGTGTACGCTCGTCGTTTGGTA  
TGGCTTCATTCAGCTCCGGTTCCCAACGATCAAGGCGAGTTACATGATCCCCCATGTTGTG  
CAAAAAGCGGTTAGCTCCTTCGGTCCTCCGAT

Anti-sense 5'-End

17 Plasmid sequences

GGGAGAGCGGCCGCCAGATCTTCCGGATGGCTCGAGTTTTTCAGCAAGATAGAACGTTCC  
GTGTACCAAGCAATTTTCATGCTCATGTTACGGCAGCAGTATACACCCTCTTAGTGTC AAT  
AAAGTCCAGTTGTTTCGGACAAAGTGCATGAAGCTTTACCAGCACGTGCTAGAAGGTCTTTA  
ATGCACTCAAGAGGGTAGCCATCAGGGCCACAGAAGTTGTTATCGACATAGCGAGTGTAT  
GCCCCTCCGTTAAGCTCACGCATGAGTTCACGGGTAACACCACTGCTATGTTTAGTGTTCC  
AGTTTTCTTGAAAATCTTCATAAGGATCAGTGCCAAGCTCGTCGCCTAAGTCAAATGACTTT  
AGATCGGCGCCGTA ACTATGGCCACCAGCTCCTTTATTACCGTTCTTACGAAGAAGAACCT  
TGCGGTAAGCCACTGGTATTTTCGCCACATGAGGGACAAGGACACCAAGTGTCTCACCAC  
TACGACCGTACTGAATGCCTTCGAGTTCTGCTACCAGCTCAACCATAACATGACCATGAGG  
TGCAGTTCGAGCATCCGAACGTTTGATGAACACATAGGGCTGTTCAAGTTGAGGCAAAACG  
CCTTTTTCAACTTCTACTAAGCCACAAGTGCCATCTTTAAGATGTTGACGTGCCTCTGATAA  
GACCTCCTCCACGGAGTCTCCAAAGCCACGTACGAGCACGTGCGAACCTGTAAAACAGG  
CAA ACTGAGTTGGACGTGTGTTTTCTCGTTGAAACCAGGGACAAGGCTCTCCATCTTACCT  
TTCGGTCACACCCGGACGAAACCTAGATGTGCTGATGATCGGCTGCAACACGGACGAAAC  
CGTAAGCAGCCTGCAGAAGATAGACGAGTACTCGTGTCTGTCAACGACAGTAATTAGTT  
ATTAATTATACTGCGTGAGTGCACTAAGCATGCAGCCGAGTGACAGCCACACAGATTTTTAA  
AGTTCGTTTAGAGAACAGATCTACAAGAGATCGAAAGTTGGTTGGTTTGTTACCTGGGAAG  
GTATAAACCTTTAAATCTTT

Anti-sense FS

17 Plasmid sequences

GGGAGAGCGGCCGCCAGATCTTCCGGATGGCTCGAGTTTTTCAGCAAGATACACTGTAGA  
GAATAAAACATTAAAGTTTGCACAATGCAGAATGCATCTGTCATCCAAACAGTTAACACAAT  
TTGGGTGGTATGTCTGATCCCAATATTTAAAATAACGGTCAAAGAGTTTTAACCTCTCTTCC  
GTGAAGTCATATTTTAACAAATCCCCTTAATGTAAGGCTTTGTTAAGTCAGTGTCAACATG  
TGACTCTGCAGTTAAAGCCCTGGTCAAGGTTAATATAGGCATTAACAATGAATAATAAGAAT  
CTACAACAGGAACTCCACTACCTGGCGTGGTTTGTATGAAATCACCGAAATCATACCAGTT  
ACCATTGAGATCTTGATTATCTAATGTCAGTACACCAACAATACCAGCATTTTCGCATGGCAT  
CACAGAATTGACTGTTTTTAACAAAGCTTGGCGTACACGTTACCTAAGTTGGCGTATACG  
CGTAATATATCTGGGTTTTCTACAAAATCATACCAGTCCTTTTTATTGAAATAATCATCATCA  
CAACAATTGTATGTGACAAGTATTTCTTTTAAATGTGTCACAATTACCTTCATCAAATGCCTT  
AAAGCATAGACGAGGTCTGCCATTGTGATTTAGTAAGACGTTGACGTGATATATGTGGTA  
CCATGTCACCGTCTATTCTAAACTTAAAGAAGTCATGTTTAGCAACAGCTGGACAATCCTTA

AGTAAATTATAAATTGTTTCTTCATGTTGGTAGTTAGAGAAAGTGTGTCTCTTAACTACAAAG  
TAAGAATCAATTAATTGTCATCTTCGTCCTTTTCTTGGAAGCGACAACAATTAGTTTTTAGG  
AATTTAGCAAACCAGCTACTTTATCATTGTAGATGTCAAAGCCCTGTATACGACATCAGT  
ACTAGTGCCTGTGCCGCACGGTGTAAGACGGGCTGCACTTACACCGCAAACCCGTTTAAA  
AACGATTGTCATCAGCTGACTGAAGCATsGGGTTCGCGGAGTTGATCACAACTACAGCCA  
ATCTTT
